# Supplementary material
Source: PubMed Central journal article supplement (PMC2681602)
Supplement: supp_8_5_703__1.pdf [file supp_8_5_703__1.pdf]

1 **Live-cell imaging and measurement of intracellular pH in filamentous fungi using a genetically**  
2 **encoded ratiometric probe**  
3 **(pH imaging in fungi using a genetically encoded probe)**

4  
5 Tanja Bagar<sup>1</sup>, Kirsten Altenbach<sup>2</sup>, Nick D. Read<sup>2</sup>, Mojca Benčina<sup>1\*</sup>

6  
7 <sup>1</sup>Department of Biotechnology, National Institute of Chemistry Slovenia, Hajdrihova 19, SI-1000  
8 Ljubljana

9 <sup>2</sup>Fungal Cell Biology Group, Institute of Cell Biology, University of Edinburgh, Edinburgh EH9 3JH,  
10 UK

## 1 **Supplementary material**

### 2 **Materials and Methods**

#### 3 **RaVC gene construction**

4 Genes encoding for Venus, Citrine and pHluorin were used as templates to construct RaVC. Replacing  
5 some fragments of pHluorin with Citrine or Venus enabled substantial codon optimization. The primers  
6 were constructed with overhangs to enable consecutive PCR ligation of the obtained PCR fragments  
7 derived from Venus, Citrine and pHluorin (Supplementary Table 1). Six fragments: 1-195 bp of  
8 Citrine, 196-244 bp of pHluorin, 245-396 bp of Citrine, 397-507 pHluorin, 508-606 bp of Venus, 607-  
9 720 pHluorin were PCR amplified. After PCR ligations we obtained a 720 bp product named RaVC  
10 (ratiometric pHluorin, Venus, Citrine) that preserved mutations which confer pHluorin with its pH  
11 sensitivity and had been partially codon optimized (Supplementary Table 2 and Supplementary Fig. 2).  
12 A point mutation at amino acid site 206 was introduced. GFP-A206K was constructed by site-directed  
13 mutagenesis, using the QuickChange XL Site-Directed Mutagenesis Kit following the manufacturer's  
14 protocol (Stratagene) using the following primers: sense 5' cctgcacacacaatctaagctttcgaaagatc and  
15 antisense 5' gggatctttcgaaagcttagattgtgtgtgca.

16 The gene obtained was cloned into the pBlueScript plasmid (Stratagene) using the blunt end *EcoRV*  
17 restriction site and transformed into *Escherichia coli* DH5 $\alpha$  for plasmid propagation. Sequencing of  
18 RaVC confirmed the expected DNA sequence. The RaVC construct was inserted into the bacterial  
19 expression plasmid pRSET (Invitrogen) using *Bam*HI and *Eco*RI restriction sites and was then  
20 expressed in *Escherichia coli* BL21(DE3) cells.

1 **Supplementary Table 1. Primers used for PCR amplifications and PCR ligations.** Underlined  
 2 bases indicate where primers anneal to template. Red marks label the start and stop codon. The green  
 3 fluorescent proteins Citrine, Venus and pHluorin were used as templates.

| template | primers: forward and reverse                                                 | base position | amino acid position |
|----------|------------------------------------------------------------------------------|---------------|---------------------|
| Citrine  | GGATCCGCCACC <b>ATG</b> <u>GTGAGCAAGGGCGAGG</u><br>ACCATAAGAGAAGGTGGTCACGAGG | 1-195         | 1-65                |
| pHluorin | <u>GTGACCACCTTCTCTTATGGTGTCAATG</u><br>GAAGTCGTGCCGTTTCATATGATCTG            | 196-243       | 66-81               |
| Citrine  | CATATGAAACGGC <u>CACGACTTCTTCAAGTC</u><br>GTTCCATCATCCTTGAAGTCGATGCCC        | 244-396       | 82-132              |
| pHluorin | CGACTTCAAGGATGATGGAAACATTATTCTTG<br><u>CTCGATGTTGTGGTGAACCTGAAAG</u>         | 397-507       | 133-169             |
| Venus    | CAAGTTCACCACAACATCGAGGACG<br><u>TTGTGTGTGCAGGTAGTGGTTGTCGG</u>               | 508-606       | 170-202             |
| pHluorin | ACCCACTACCTGCACACACAATCTG<br>GAATTC <b>TTA</b> <u>TTTGTATAGTTCATC</u>        | 607-720       | 203-240             |

1 **Supplementary Table 2. Codon usage *Aspergillus niger* and the number of codon triplets in**  
 2 **pHluorin and RaVC.**

| Amino acids | Codon triplet | Codon usage frequency <i>A. niger</i> [%] | pHluorin-R [amino acids number] | RaVC [amino acids number] | Amino acids | Codon triplet | Codon usage frequency <i>A. niger</i> [%] | pHluorin-R [amino acids number] | RaVC [amino acids number] |
|-------------|---------------|-------------------------------------------|---------------------------------|---------------------------|-------------|---------------|-------------------------------------------|---------------------------------|---------------------------|
| Ala         | GCA           | 12                                        | 3                               | <b>1</b>                  | Thr         | ACA           | 11                                        | 6                               | <b>3</b>                  |
|             | GCC           | 43                                        | 2                               | <b>5</b>                  |             | ACC           | 50                                        | 3                               | <b>13</b>                 |
|             | GCG           | 16                                        |                                 |                           |             | ACG           | 17                                        |                                 |                           |
|             | GCT           | 29                                        | 4                               | <b>3</b>                  |             | ACT           | 21                                        | 7                               |                           |
| Arg         | CGA           | 8                                         |                                 |                           | Val         | GTA           | 5                                         | 2                               | <b>2</b>                  |
|             | CGC           | 36                                        |                                 | <b>1</b>                  |             | GTC           | 45                                        | 6                               | <b>3</b>                  |
|             | CGG           | 15                                        | 1                               | <b>3</b>                  |             | GTG           | 28                                        | 1                               | <b>11</b>                 |
|             | CGT           | 27                                        | 1                               |                           |             | GTT           | 22                                        | 8                               | <b>2</b>                  |
|             | AGA           | 7                                         | 4                               | <b>2</b>                  | His         | CAC           | 66                                        | 7                               | <b>10</b>                 |
|             | AGG           | 7                                         |                                 |                           |             | CAT           | 34                                        | 5                               | <b>2</b>                  |
| Asn         | AAC           | 76                                        | 7                               | <b>10</b>                 | Gln         | CAA           | 24                                        | 7                               | <b>4</b>                  |
|             | AAT           | 24                                        | 4                               | <b>1</b>                  |             | CAG           | 76                                        | 1                               | <b>4</b>                  |
| Lys         | AAA           | 16                                        | 14                              | <b>6</b>                  | Gly         | GGA           | 18                                        | 8                               | <b>2</b>                  |
|             | AAG           | 84                                        | 5                               | <b>13</b>                 |             | GGC           | 40                                        | 4                               | <b>17</b>                 |
| Asp         | GAC           | 58                                        | 6                               | <b>13</b>                 |             | GGG           | 9                                         | 3                               | <b>2</b>                  |
|             | GAT           | 42                                        | 13                              | <b>6</b>                  |             | GGT           | 34                                        | 8                               | <b>2</b>                  |
| Glu         | GAA           | 29                                        | 12                              | <b>4</b>                  | Leu         | CTA           | 5                                         | 3                               | <b>1</b>                  |
|             | GAG           | 71                                        | 4                               | <b>12</b>                 |             | CTC           | 29                                        |                                 | <b>2</b>                  |
| Cys         | TGC           | 67                                        | 2                               | <b>2</b>                  |             | CTG           | 33                                        | 1                               | <b>11</b>                 |
|             | TGT           | 33                                        |                                 |                           |             | CTT           | 15                                        | 10                              | <b>3</b>                  |
| Trp         | TGG           | 100                                       | 1                               | <b>1</b>                  |             | TTA           | 2                                         | 3                               |                           |
| Ser         | TCA           | 6                                         | 1                               | <b>1</b>                  |             | TTG           | 16                                        | 2                               | <b>2</b>                  |
|             | TCC           | 30                                        |                                 | <b>2</b>                  | Phe         | TTC           | 75                                        | 4                               | <b>10</b>                 |
|             | TCG           | 16                                        | 1                               | <b>1</b>                  |             | TTT           | 25                                        | 10                              | <b>4</b>                  |
|             | TCT           | 17                                        | 3                               | <b>2</b>                  | Pro         | CCA           | 12                                        | 6                               | <b>1</b>                  |
|             | AGC           | 21                                        |                                 | <b>2</b>                  |             | CCC           | 42                                        | 2                               | <b>9</b>                  |
|             | AGT           | 10                                        | 3                               |                           |             | CCG           | 21                                        |                                 |                           |
| Ile         | ATA           | 4                                         | 1                               |                           | CCT         | 25            | 2                                         |                                 |                           |
|             | ATC           | 66                                        | 3                               | <b>9</b>                  | Met         | ATG           | 100                                       | 6                               | <b>6</b>                  |
|             | ATT           | 30                                        | 7                               | <b>2</b>                  |             | STOP          | TAA                                       | 39                              | 1                         |
| Try         | TAC           | 73                                        | 7                               | <b>9</b>                  | TAG         | 31            |                                           |                                 |                           |
|             | TAT           | 27                                        | 4                               | <b>2</b>                  | TGA         | 30            |                                           |                                 |                           |

|    |          |                                                                                                       |
|----|----------|-------------------------------------------------------------------------------------------------------|
| 1  |          | 1 2                                                                                                   |
| 2  | gfp-1    | M-GKGEELFTGVVPIILVELDGDVNGHKFSVSSEGEEDATYGKLTLLKFICTTGKLPVPWPT                                        |
| 3  | pHluorin | M-SKGEELFTGVVPIILVELDGDVNGHKFSVSSEGEEDATYGKLTLLKFICTTGKLPVPWPT                                        |
| 4  | Venus    | MVSKGEELFTGVVPIILVELDGDVNGHKFSVSSEGEEDATYGKLTLLKFICTTGKLPVPWPT                                        |
| 5  | Citrine  | MVSKGEELFTGVVPIILVELDGDVNGHKFSVSSEGEEDATYGKLTLLKFICTTGKLPVPWPT                                        |
| 6  | RaVC     | MVSKGEELFTGVVPIILVELDGDVNGHKFSVSSEGEEDATYGKLTLLKFICTTGKLPVPWPT                                        |
| 7  |          | 60                                                                                                    |
| 8  | gfp-1    | LVTTF <sup>S</sup> YGVQCF <sup>S</sup> SRYPDHMKR <sup>H</sup> HDFFKSAMPEGYVQERTIFFKDDGNYKTRAEVKFEGDTL |
| 9  | pHluorin | LVTTF <sup>S</sup> YGVQCF <sup>S</sup> SRYPDHMKR <sup>H</sup> HDFFKSAMPEGYVQERTIFFKDDGNYKTRAEVKFEGDTL |
| 10 | Venus    | LVTTF <sup>S</sup> YGLMCFARYPDHMKQ <sup>H</sup> HDFFKSAMPEGYVQERTIFFKDDGNYKTRAEVKFEGDTL               |
| 11 | Citrine  | LVTTF <sup>S</sup> YGLMCFARYPDHMKQ <sup>H</sup> HDFFKSAMPEGYVQERTIFFKDDGNYKTRAEVKFEGDTL               |
| 12 | RaVC     | LVTTF <sup>S</sup> YGVQCF <sup>S</sup> SRYPDHMKR <sup>H</sup> HDFFKSAMPEGYVQERTIFFKDDGNYKTRAEVKFEGDTL |
| 13 |          | 120                                                                                                   |
| 14 | gfp-1    | VNRIELKGIDFKEDGNILGHKLEYNYN <sup>S</sup> SHNVYIMADKQKNGTKVNFKIRHNIEDGSVQLA                            |
| 15 | pHluorin | VNRIELKGIDFK <sup>D</sup> DDGNILGHKLEYN <sup>N</sup> NEHLVYIMADKQKNGTKAIFQVHHNIEDGGVQLA               |
| 16 | Venus    | VNRIELKGIDFKEDGNILGHKLEYNYN <sup>S</sup> SHNVYIMADKQKNGIKVNFKIRHNIEDGGVQLA                            |
| 17 | Citrine  | VNRIELKGIDFKEDGNILGHKLEYNYN <sup>S</sup> SHNVYIMADKQKNGIKVNFKIRHNIEDGSVQLA                            |
| 18 | RaVC     | VNRIELKGIDFK <sup>D</sup> DDGNILGHKLEYN <sup>N</sup> NEHLVYIMADKQKNGTKAIFQVHHNIEDGGVQLA               |
| 19 |          | 180                                                                                                   |
| 20 | gfp-1    | DHYQQNTPIGDGPVLLPDNHYLSTQSALS <sup>S</sup> KDPNEKRDHMLLEFVTAAGITHGMDELYK                              |
| 21 | pHluorin | DHYQQNTPIGDGPVLLPDNHYLHTQSALS <sup>S</sup> KDPNEKRDHMLLEFVTAAGITHGMDELYK                              |
| 22 | Venus    | DHYQQNTPIGDGPVLLPDNHYLSYQSALS <sup>S</sup> KDPNEKRDHMLLEFVTAAGITLGMDELYK                              |
| 23 | Citrine  | DHYQQNTPIGDGPVLLPDNHYLSYQSALS <sup>S</sup> KDPNEKRDHMLLEFVTAAGITLGMDELYK                              |
| 24 | RaVC     | DHYQQNTPIGDGPVLLPDNHYLHTQSALS <sup>S</sup> KDPNEKRDHMLLEFVTAAGITHGMDELYK                              |

25 **Supplementary FIG. 1. Alignment of *gfp-1*, *pHluorin*, *Venus*, *Citrine* and *RaVC*.**

26 Amino acids marked in gray were used to construct *RaVC*; yellow indicates mutations characteristic  
 27 for *pHluorin*; red indicates point mutation known to prevent di- and oligo-merization of GFP.
